# Supplementary material for: Ocean control on sea ice in the Nordic Seas
Source: Copernicus journal article supplement (doi:10.5194/cp-21-2225-2025), 2025-11-17
Supplement: Supplementary file 1 [file cp-21-2225-2025-supplement.pdf]

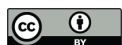

## *Supplement of*

## **Ocean control on sea ice in the Nordic Seas**

**Wanyee Wong et al.**

*Correspondence to:* Wanyee Wong (yunw@norcereasearch.no)

The copyright of individual parts of the supplement might differ from the article licence.

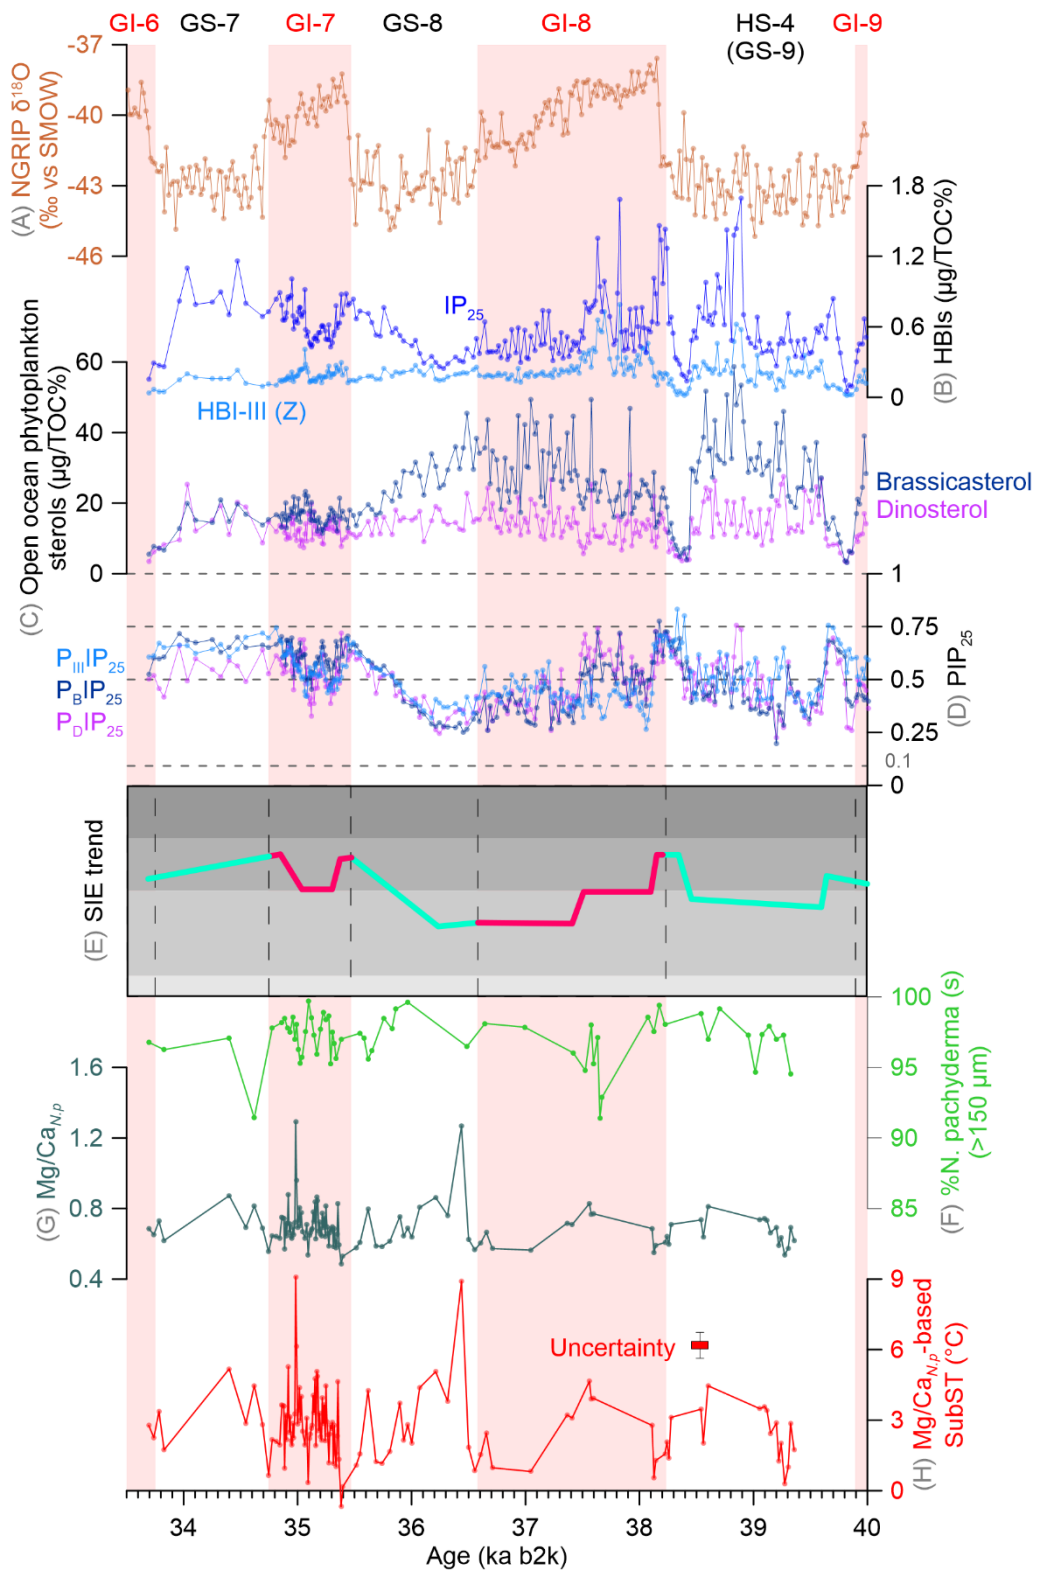

Figure S1. Biomarker and foraminiferal results from MD99-2304 with NGRIP  $\delta^{18}\text{O}$  as a reference. (A) NGRIP  $\delta^{18}\text{O}$  (‰ vs SMOW) (GIC05 age model) (North Greenland Ice Core Project members, 2004; Andersen et al., 2006), (B)  $\text{IP}_{25}$  and HBI-III (Z), (C) brassicasterol and dinosterol, (D)  $\text{PIP}_{25}$ , (E) sea ice extent (SIE) trend based on  $\text{PIP}_{25}$  indices, (F) relative abundance (%) of *Neogloboquadrina pachyderma* (sinistral) (>150  $\mu\text{m}$ ), (G) Mg/Ca ratio in *N. pachyderma*, and (H) subsurface temperature (SubST) reconstruction from  $\text{Mg}/\text{Ca}_{\text{N.p.}}$ , with uncertainty range ( $\pm 0.32^\circ\text{C}$ ) following Elderfield and Ganssen (2000). Relative abundance of *N. pachyderma* (s) is shown only for samples containing more than 100 planktonic foraminifera. These records are expressed in terms of ka 2bk. The pink bars mark GIs as defined in the NGRIP ice core (Rasmussen et al., 2014). The horizontal dashed lines in panel (D) and the grey boxes in panel (E) relate to different sea ice conditions (0.75–1 extensive sea ice, 0.5–0.75 seasonal ice / stable ice edge, 0.1–0.5 limited but variable ice, 0–0.1 ice-free) (Xiao et al., 2015; Stein et al., 2017).
